# Supplementary material for: Glycidol Fatty Acid Ester and 3-Monochloropropane-1,2-Diol Fatty Acid Ester in Commercially Prepared Foods
Source: MDPI journal article supplement (doi:10.3390/foods10122905), 2021-11-24
Supplement: s1 [file s1]

**Table S1.** Concentration of GEs in individual food samples

| Foodstuff                          | Total fat<br>(g/100 g) | Total of GEs<br>(ng/g) | Stearate | Oleate | Linoleate | Linolenate | Palmitate |
|------------------------------------|------------------------|------------------------|----------|--------|-----------|------------|-----------|
| Instant<br>noodles                 | 21.1                   | 745.9                  | 37.3     | 391.4  | 89.2      | 3.4        | 224.7     |
|                                    | 16.5                   | 400.7                  | 18.8     | 210.4  | 50.9      | 2.2        | 118.5     |
|                                    | 19.7                   | 288.3                  | 14.6     | 153.5  | 39.6      | 1.8        | 78.8      |
|                                    | 17.5                   | 245.4                  | 12.8     | 130.6  | 37.8      | 0.7        | 63.5      |
|                                    | 23.0                   | 243.5                  | 13.3     | 129.5  | 31.3      | 1.4        | 68.0      |
| Fried chicken                      | 5.0 g/product          | 1003.4                 | 34.2     | 556.2  | 153.7     | 6.1        | 253.2     |
|                                    | 10.3                   | 678.4                  | 36.2     | 392.9  | 104.2     | 3.0        | 142.1     |
|                                    | 15.1                   | 586.2                  | 26.4     | 352.7  | 86.3      | 3.4        | 117.4     |
|                                    | 12.0                   | 157.9                  | 11.5     | 41.7   | 78.0      | 8.2        | 18.5      |
|                                    | 23.8                   | 65.9                   | 1.1      | 41.6   | 18.9      | 4.3        | N.D.      |
|                                    | 11.9                   | 22.1                   | 1.4      | 5.6    | 11.5      | 1.6        | 2.1       |
| Fried<br>confectionery<br>(potato) | 36.0                   | 796.3                  | 37.7     | 426.9  | 175.3     | 5.6        | 150.8     |
|                                    | 26.8                   | 473.8                  | 13.2     | 263.0  | 103.7     | 3.9        | 89.9      |
|                                    | 36.0                   | 399.7                  | 36.2     | 15.6   | 170.8     | 6.4        | 170.7     |
| Fried<br>confectionery<br>(wheat)  | 18.1                   | 356.7                  | 0.2      | 188.2  | 126.0     | 4.5        | 37.8      |
|                                    | 16.7                   | 155.3                  | 2.0      | 91.4   | 58.6      | 2.5        | 0.8       |
|                                    | 16.0                   | 127.1                  | N.D.     | 68.4   | 53.5      | 4.4        | 0.9       |
|                                    | 29.1                   | 617.7                  | N.D.     | 423.8  | 149.2     | 5.8        | 38.9      |
| Fried bread                        | 20.9 g/product         | 178.2                  | 0.4      | 94.9   | 41.4      | 1.7        | 39.9      |
|                                    | 14.4 g/product         | 169.0                  | N.D.     | 126.6  | 38.5      | 1.8        | 2.0       |
|                                    | 10.8 g/product         | 143.2                  | 12.9     | 76.4   | 14.5      | 1.1        | 38.3      |
|                                    | 7.4 g/product          | 129.2                  | N.D.     | 98.6   | 27.8      | 0.9        | 1.8       |
|                                    | 22.3                   | 67.4                   | 5.4      | 34.7   | 9.6       | N.D.       | 17.7      |
|                                    | 13.7 g/product         | 27.1                   | N.D.     | 10.1   | 14.8      | 1.3        | 1.0       |

N.D.: Not detected.

Table S1. Continued

| Foodstuff                       | Total fat<br>(g/100 g) | Total of GEs<br>(ng/g) | Stearate | Oleate | Linoleate | Linolenate | Palmitate |
|---------------------------------|------------------------|------------------------|----------|--------|-----------|------------|-----------|
| Hamburger<br>steak              | 11.0                   | 125.9                  | 6.1      | 65.7   | 16.3      | 2.1        | 35.8      |
|                                 | 11.8                   | 2.4                    | 0.4      | 0.7    | 0.3       | 0.2        | 0.9       |
|                                 | 5.8                    | N.D.                   | N.D.     | N.D.   | N.D.      | N.D.       | N.D.      |
| Grilled saury                   | 12.6                   | 2.5                    | 0.5      | 0.5    | N.D.      | N.D.       | 1.5       |
|                                 | 16.0                   | 0.7                    | 0.1      | N.D.   | 0.2       | N.D.       | 0.4       |
| Canned<br>grilled<br>chicken    | 9.1                    | 56.1                   | 0.1      | 26.7   | 11.9      | 0.5        | 16.9      |
|                                 | 10.6                   | 23.5                   | N.D.     | 14.9   | 1.2       | 0.1        | 7.3       |
|                                 | 9.3                    | 16.3                   | N.D.     | 8.4    | 2.6       | 0.1        | 5.3       |
| Mayonnaise                      | 74.7                   | 449.7                  | 1.2      | 206.1  | 199.6     | 40.8       | 1.9       |
|                                 | 73.3                   | 345.5                  | N.D.     | 117.8  | 183.2     | 22.8       | 21.7      |
| Dressing                        | 38.0                   | 311.9                  | 4.9      | 240.6  | 43.4      | 12.7       | 10.3      |
|                                 | 36.0                   | 236.6                  | 1.6      | 136.1  | 76.1      | 21.2       | 1.7       |
|                                 | 19.3                   | 230.8                  | 2.7      | 184.3  | 30.4      | 9.1        | 4.3       |
|                                 | 28.7                   | 185.0                  | 2.2      | 93.0   | 65.4      | 9.8        | 14.5      |
|                                 | 25.3                   | 139.8                  | 2.1      | 57.1   | 67.3      | 12.3       | 1.1       |
|                                 | 28.0                   | 127.8                  | 1.7      | 77.9   | 31.6      | 7.7        | 8.9       |
| Other<br>cooked<br>frozen foods | 19.5                   | 84.4                   | 5.3      | 50.3   | 10.1      | 0.5        | 18.2      |
|                                 | 17.7                   | 259.3                  | 9.4      | 152.3  | 44.2      | 3.4        | 50.0      |
|                                 | 14.1                   | 293.9                  | 12.2     | 164.4  | 48.2      | 1.3        | 67.8      |
|                                 | 18.2                   | 7.3                    | N.D.     | 4.3    | 1.6       | N.D.       | 1.5       |
|                                 | 26.7                   | 10.2                   | N.D.     | 3.6    | 5.3       | 1.3        | N.D.      |
|                                 | 8.2                    | 79.3                   | 4.1      | 35.6   | 10.0      | 0.7        | 28.9      |
|                                 | 8.4                    | 36.8                   | 1.4      | 20.3   | 10.3      | 1.0        | 3.8       |
|                                 | 14.0                   | 100.4                  | 5.1      | 55.2   | 18.1      | 1.8        | 20.3      |

N.D.: Not detected.

**Table S2.** Concentration of 3-MCPDEs in individual food samples

| Foodstuff                          | Total fat<br>(g/100 g) | Total of 3-<br>MCPDEs<br>(ng/g) | Stearate | Oleate | Linoleate | Linolenate | Palmitate |
|------------------------------------|------------------------|---------------------------------|----------|--------|-----------|------------|-----------|
| Instant<br>noodles                 | 21.1                   | 86.4                            | 0.5      | 44.6   | N.D.      | 4.5        | 36.9      |
|                                    | 16.5                   | 81.4                            | 0.1      | 44.6   | N.D.      | N.D.       | 36.8      |
|                                    | 19.7                   | 61.8                            | N.D.     | 33.7   | N.D.      | N.D.       | 28.1      |
|                                    | 17.5                   | 50.6                            | 0.4      | 27.4   | N.D.      | N.D.       | 22.8      |
|                                    | 23.0                   | 13.8                            | 0.1      | N.D.   | N.D.      | N.D.       | 13.8      |
| Fried chicken                      | 5.0 g/product          | 23.3                            | N.D.     | 11.5   | N.D.      | N.D.       | 11.8      |
|                                    | 10.3                   | 9.1                             | 0.2      | 5.1    | N.D.      | N.D.       | 3.8       |
|                                    | 15.1                   | 8.8                             | N.D.     | 8.8    | N.D.      | N.D.       | N.D.      |
|                                    | 12.0                   | 8.3                             | N.D.     | 8.3    | N.D.      | N.D.       | N.D.      |
|                                    | 23.8                   | 6.1                             | N.D.     | 6.1    | N.D.      | N.D.       | N.D.      |
|                                    | 11.9                   | 1.1                             | N.D.     | 0.9    | N.D.      | N.D.       | 0.2       |
| Fried<br>confectionery<br>(potato) | 36.0                   | 71.0                            | N.D.     | 50.8   | N.D.      | N.D.       | 20.3      |
|                                    | 26.8                   | 65.8                            | N.D.     | 45.2   | N.D.      | N.D.       | 20.5      |
|                                    | 36.0                   | 44.0                            | N.D.     | 31.3   | N.D.      | N.D.       | 12.7      |
| Fried<br>confectionery<br>(wheat)  | 18.1                   | 9.3                             | N.D.     | 9.3    | N.D.      | N.D.       | N.D.      |
|                                    | 16.7                   | 6.8                             | N.D.     | 6.8    | N.D.      | N.D.       | N.D.      |
|                                    | 16.0                   | 6.7                             | N.D.     | 6.7    | N.D.      | N.D.       | N.D.      |
|                                    | 29.1                   | 4.3                             | N.D.     | 4.3    | N.D.      | N.D.       | N.D.      |
| Fried bread                        | 20.9 g/product         | 21.3                            | N.D.     | 7.9    | N.D.      | N.D.       | 13.3      |
|                                    | 14.4 g/product         | 15.1                            | N.D.     | N.D.   | N.D.      | N.D.       | 15.1      |
|                                    | 10.8 g/product         | 3.1                             | N.D.     | 3.1    | N.D.      | N.D.       | N.D.      |
|                                    | 7.4 g/product          | 0.1                             | 0.1      | N.D.   | N.D.      | N.D.       | N.D.      |
|                                    | 22.3                   | N.D.                            | N.D.     | N.D.   | N.D.      | N.D.       | N.D.      |
|                                    | 13.7 g/product         | N.D.                            | N.D.     | N.D.   | N.D.      | N.D.       | N.D.      |

N.D.: Not detected.

Table S2. Continued

| Foodstuff                       | Total fat<br>(g/100 g) | Total of 3-<br>MCPDEs<br>(ng/g) | Stearate | Oleate | Linoleate | Linolenate | Palmitate |
|---------------------------------|------------------------|---------------------------------|----------|--------|-----------|------------|-----------|
| Hamburger<br>steak              | 11.0                   | 1.2                             | N.D.     | 0.7    | N.D.      | N.D.       | 0.5       |
|                                 | 11.8                   | 0.6                             | N.D.     | N.D.   | N.D.      | N.D.       | 0.6       |
|                                 | 5.8                    | N.D.                            | N.D.     | N.D.   | N.D.      | N.D.       | N.D.      |
| Grilled saury                   | 12.6                   | 0.2                             | N.D.     | 0.2    | N.D.      | N.D.       | N.D.      |
|                                 | 16.0                   | N.D.                            | N.D.     | N.D.   | N.D.      | N.D.       | N.D.      |
| Canned<br>grilled<br>chicken    | 9.1                    | 13.0                            | N.D.     | 9.6    | N.D.      | N.D.       | 3.4       |
|                                 | 10.6                   | 0.9                             | N.D.     | 0.8    | N.D.      | N.D.       | 0.1       |
|                                 | 9.3                    | 0.4                             | N.D.     | 0.4    | N.D.      | N.D.       | N.D.      |
| Mayonnaise                      | 74.7                   | 19.3                            | N.D.     | 18.4   | N.D.      | N.D.       | 0.8       |
|                                 | 73.3                   | 17.7                            | 0.6      | 17.1   | N.D.      | N.D.       | N.D.      |
| Dressing                        | 38.0                   | 11.1                            | N.D.     | 9.6    | N.D.      | N.D.       | 1.5       |
|                                 | 36.0                   | 7.9                             | N.D.     | 7.9    | N.D.      | N.D.       | N.D.      |
|                                 | 19.3                   | 6.4                             | 0.2      | 5.5    | N.D.      | N.D.       | 0.7       |
|                                 | 28.7                   | 6.3                             | N.D.     | 6.3    | N.D.      | N.D.       | N.D.      |
|                                 | 25.3                   | 1.9                             | N.D.     | 1.9    | N.D.      | N.D.       | N.D.      |
|                                 | 28.0                   | 1.9                             | N.D.     | 1.9    | N.D.      | N.D.       | N.D.      |
| Other<br>cooked<br>frozen foods | 19.5                   | 24.2                            | 1.2      | 16.0   | N.D.      | N.D.       | 7.0       |
|                                 | 17.7                   | 35.2                            | N.D.     | 27.6   | N.D.      | N.D.       | 7.6       |
|                                 | 14.1                   | 15.2                            | N.D.     | 15.2   | N.D.      | N.D.       | N.D.      |
|                                 | 18.2                   | 1.7                             | 0.1      | 1.2    | N.D.      | N.D.       | 0.3       |
|                                 | 26.7                   | 6.6                             | N.D.     | 6.4    | N.D.      | N.D.       | 0.2       |
|                                 | 8.2                    | 1.8                             | N.D.     | 1.2    | N.D.      | N.D.       | 0.6       |
|                                 | 8.4                    | 48.4                            | 0.1      | 14.9   | 27.6      | 5.8        | N.D.      |
|                                 | 14.0                   | 54.8                            | 0.4      | 21.7   | N.D.      | 28.9       | 3.8       |

N.D.: Not detected.
